# Supplementary material for: Synthesis, luminescence, and anti-tumor properties of MgSiO3:Eu-DOX-DPP-RGD hollow microspheres
Source: Royal Society of Chemistry journal article supplement (doi:10.1039/c5dt03604f), 2015-01-01
Supplement: c5dt03604f1.pdf [file c5dt03604f1.pdf]

# Synthesis, luminescence, and anti-tumor properties of MgSiO<sub>3</sub>:Eu-DOX-DPP-RGD hollow microspheres

Ruichan Lv,<sup>a</sup> Chongna Zhong,<sup>a</sup> Arif Gulzar,<sup>a</sup> Shili Gai,<sup>a</sup> Fei He,<sup>a</sup> Rui Gu,<sup>b,\*</sup>

Shenghuan Zhang,<sup>a</sup> Guixin Yang,<sup>a</sup> and Piaoping Yang<sup>a,\*</sup>

<sup>a</sup>Key Laboratory of Superlight Materials and Surface Technology, Ministry of Education, College of Material Sciences and Chemical Engineering, Harbin Engineering University, Harbin, 150001, P. R. China,<sup>b</sup>Department of Orthopedics, China-Japan Union Hospital of Jilin University, Changchun, 130033, P. R. China

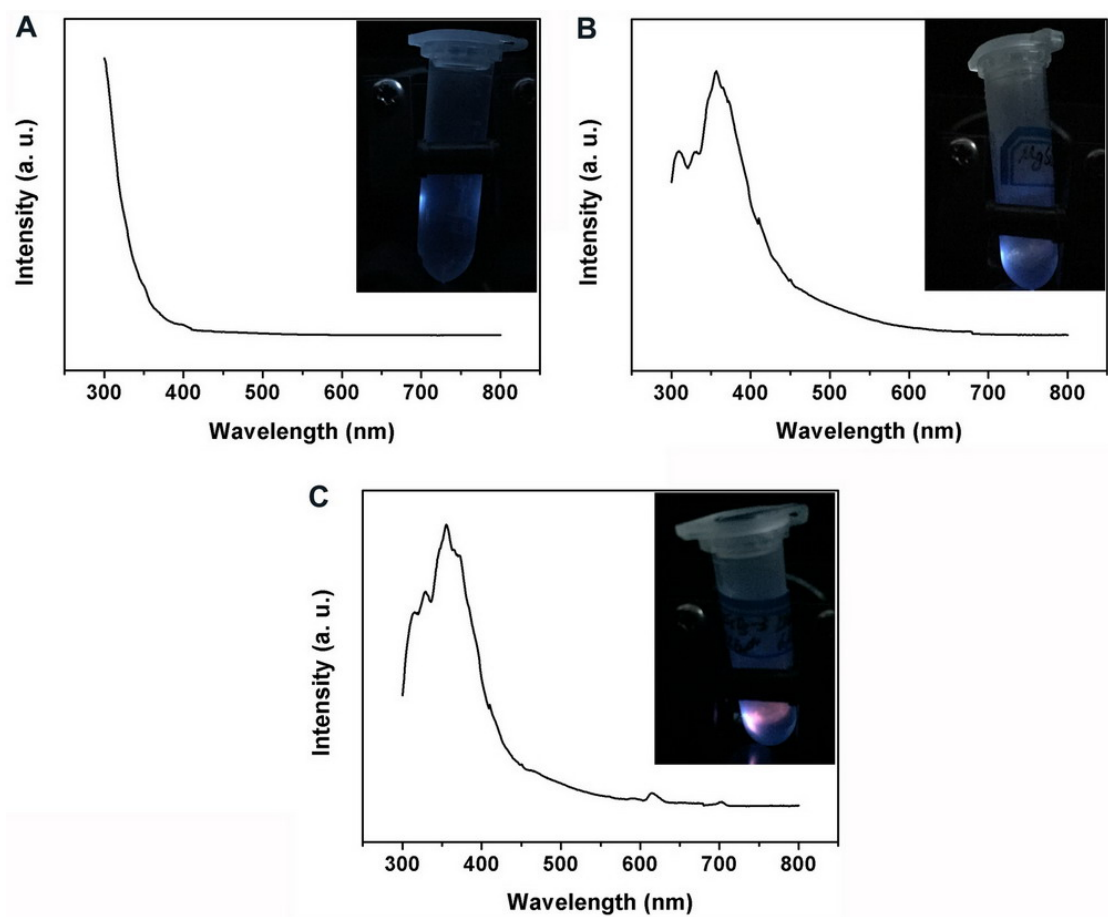

**Fig. S1** The excitation spectra of (A) the sample holder, (B)  $\text{MgSiO}_3:0\%\text{Eu}$ , and (C)  $\text{MgSiO}_3:\text{Eu}$  under the excitation at 265 nm.

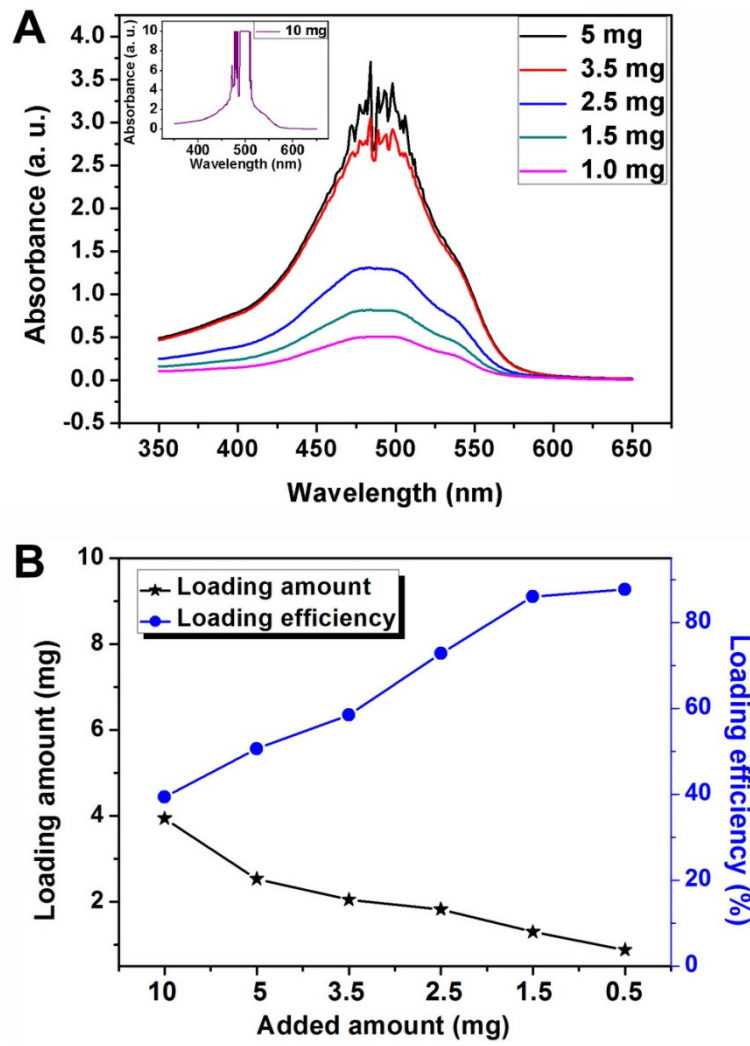

**Fig. S2** (A) The absorbance spectra of the supernatants of the solutions after adding different amount of DOX. (B) The loading amount and loading efficiency of the samples versus the added DOX amount.

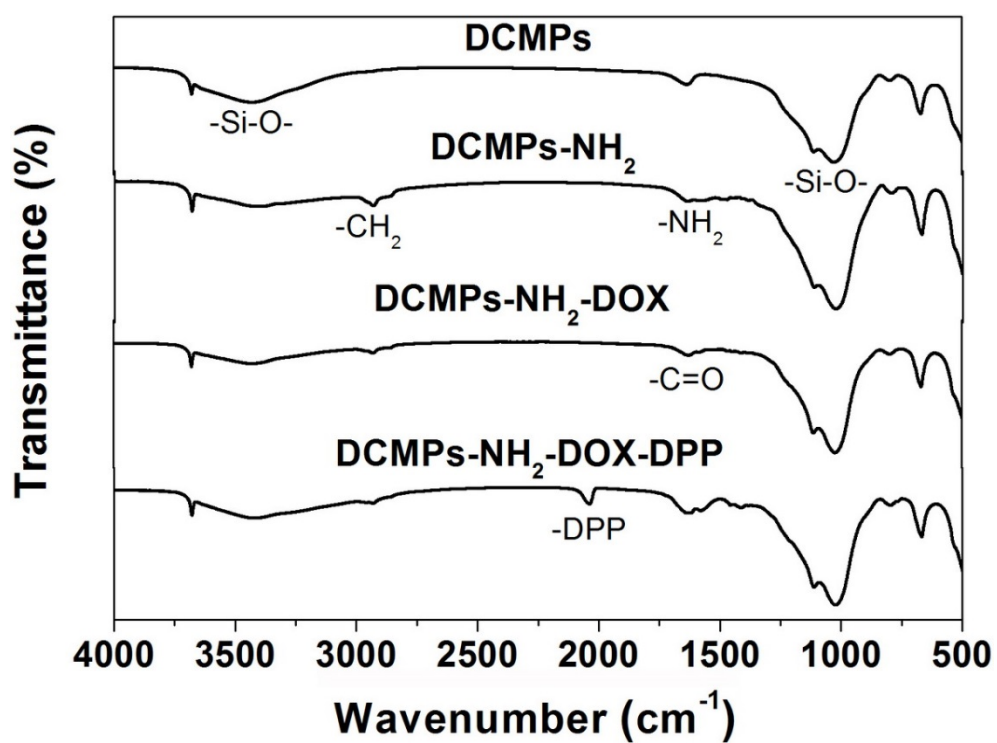

**Fig. S3** the FT-IR spectra of DCMPs, DCMPs-NH<sub>2</sub>, DCMPs-NH<sub>2</sub>-DOX, and DCMPs-NH<sub>2</sub>-DOX-DPP.

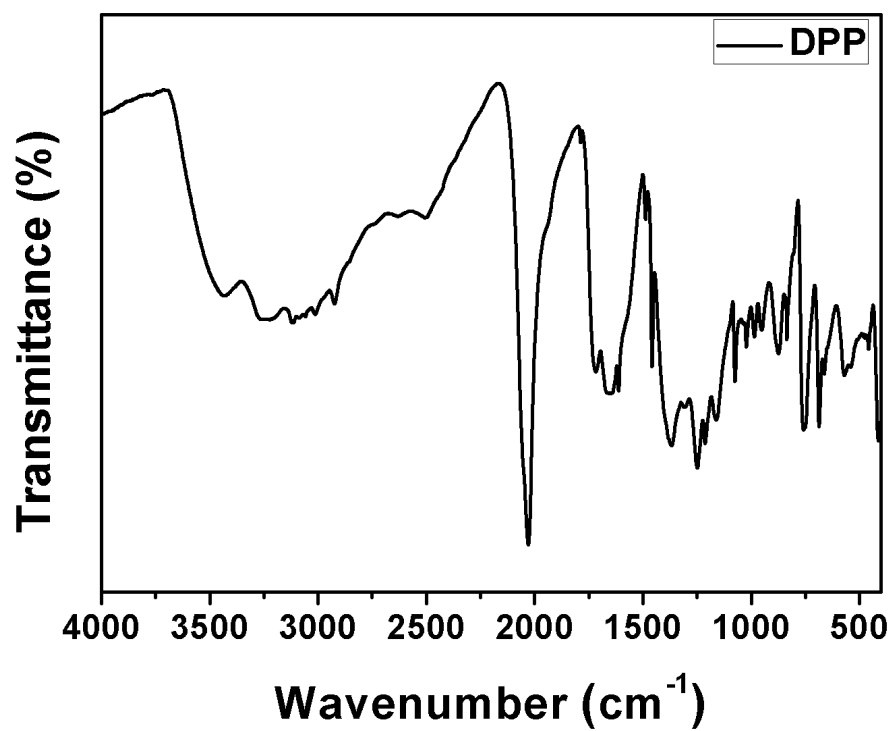

**Fig. S4** FT-IR spectrum of light-activated DPP.

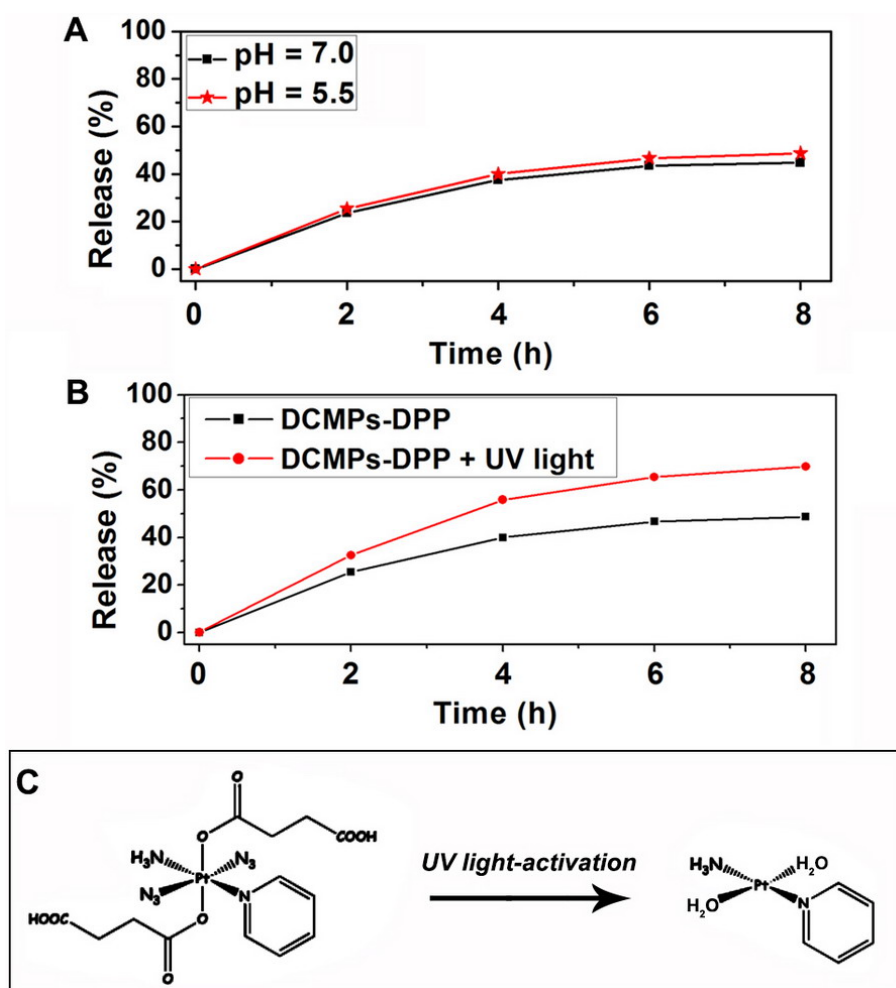

**Fig. S5** The release efficiency of Pt from DCMPs-DPP (A) with different pH values of 5.5 and 7.0 (without UV light irradiation), and (B) with and without UV light irradiation (pH = 5.5). (C) The postulated drug release pathway of DPP to Pt(II) drugs

**Table S1.** The ICP-MS result of MgSiO<sub>3</sub>:x%Eu DCMPs

|                                                    |       |       |       |       |        |
|----------------------------------------------------|-------|-------|-------|-------|--------|
| MgSiO <sub>3</sub> :x%Eu<br>(stoichiometric ratio) | 0.5%  | 1%    | 2%    | 5%    | 10%    |
| MgSiO <sub>3</sub> :x%Eu<br>(measured ratio)       | 0.55% | 1.16% | 2.35% | 5.33% | 10.67% |

**Table S2.** The loading property with different added amount of DOX

| Added amount | Absorbance of supernatant | Loading amount | Loading efficiency |
|--------------|---------------------------|----------------|--------------------|
| 10           | 5.7                       | 3.94           | 39.38              |
| 5            | 3.1                       | 2.53           | 50.60              |
| 3.5          | 2.7                       | 2.05           | 58.46              |
| 2.5          | 1.3                       | 1.82           | 72.76              |
| 1.5          | 0.81                      | 1.29           | 86.06              |
| 1.0          | 0.48                      | 0.88           | 87.69              |
